# Supplementary material for: Amino acid-driven adsorption of emerging contaminants in water by modified graphene oxide nanosheets
Source: Royal Society of Chemistry journal article supplement (doi:10.1039/d2ew00871h), 2023-01-01
Supplement: d2ew00871h1.pdf [file d2ew00871h1.pdf]

## **Electronic Supplementary Information for:**

### **Amino acid-driven adsorption of emerging contaminants in water by modified graphene oxide nanosheets**

#### **Contents:**

1. Purification set up
2. Zeta potential
3. X-Ray Photoelectron spectroscopy (XPS)
4. Elemental analysis
5. Adsorption selectivity and kinetic experiments
6. Adsorption isotherms
7. Molecular dynamic simulation

## 1. Purification setup

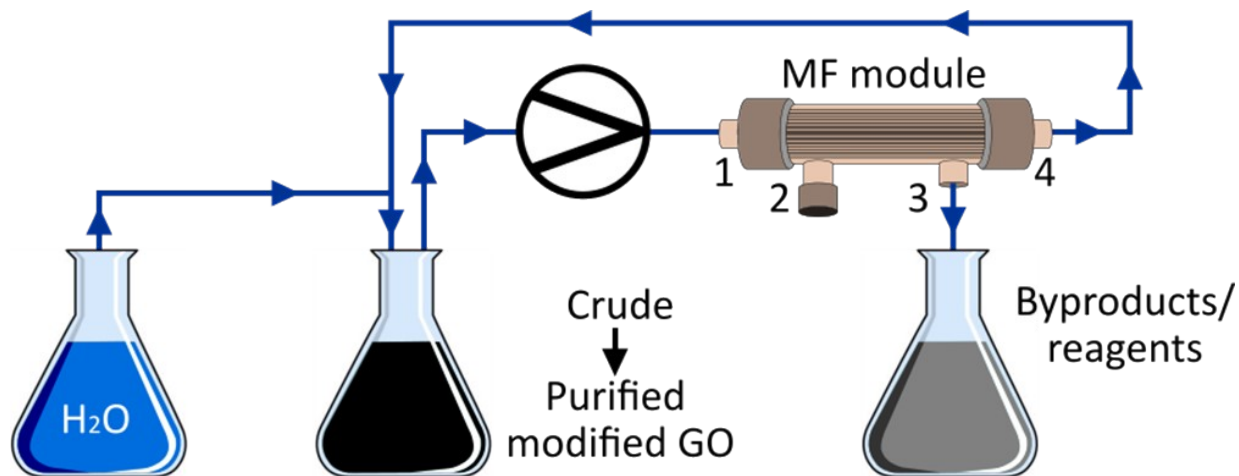

**Fig. S1.** Sketch of the purification set up. The crude is pumped into the microfiltration module (Plasmart 100, Versatile™ PES membranes, cut-off 150 nm) in tangential modality, i.e. input from nozzle 1, output from nozzle 4. Nozzle 3 was opened to collect water with unreacted by-products, while modified GO could not pass through the membrane section, and it was recirculated 1→4. Ultrapure water was periodically added to the feed suspension to wash the GO nanosheets during the recirculation that was carried out until no amino acids residuals were detected into the washing water solution and until the pH was neutral.

## 2. Zeta potential

Z potential was measured in ultrapure water, using NanoBrook Omni Particle Size Analyzer Brookhaven Instruments Corporation, USA.

### 3. X-Ray Photoelectron spectroscopy (XPS)

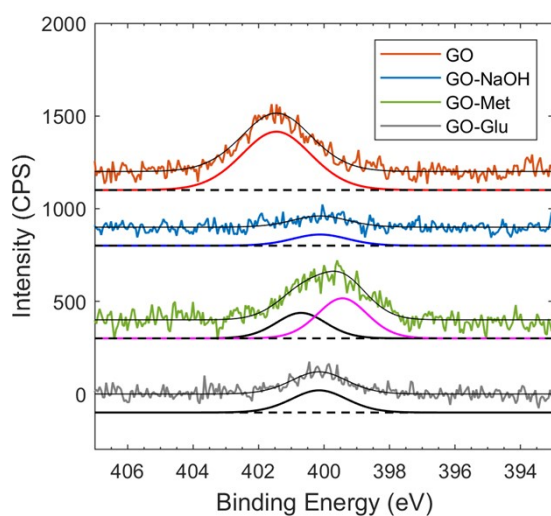

**Fig. S2.** N1s XPS signal of GO, GO-NaOH, GO-Met and GO-Glu. The fitted peaks were at: 401.5 eV for GO, 400.1 eV for GO-NaOH, 400.7 eV and 399.4 eV for GO-Met and 400.2 eV for GO-Glu.

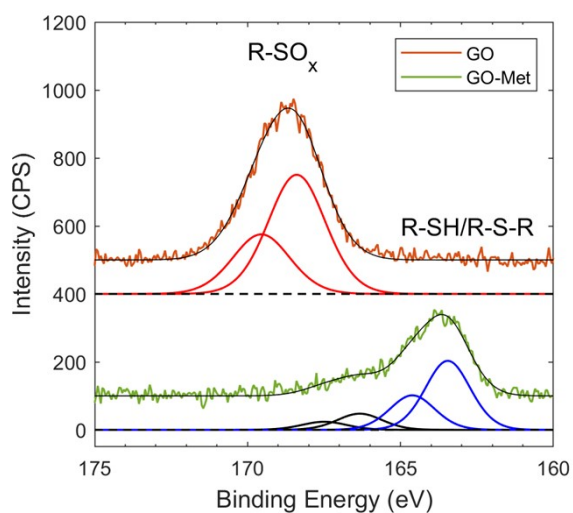

**Fig. S3.** S 2p XPS signal of GO and GO-Met. The fitted S 2p 3/2 were at 168.4 eV for GO, 163.4 eV and 166.3 eV for GO-Met.

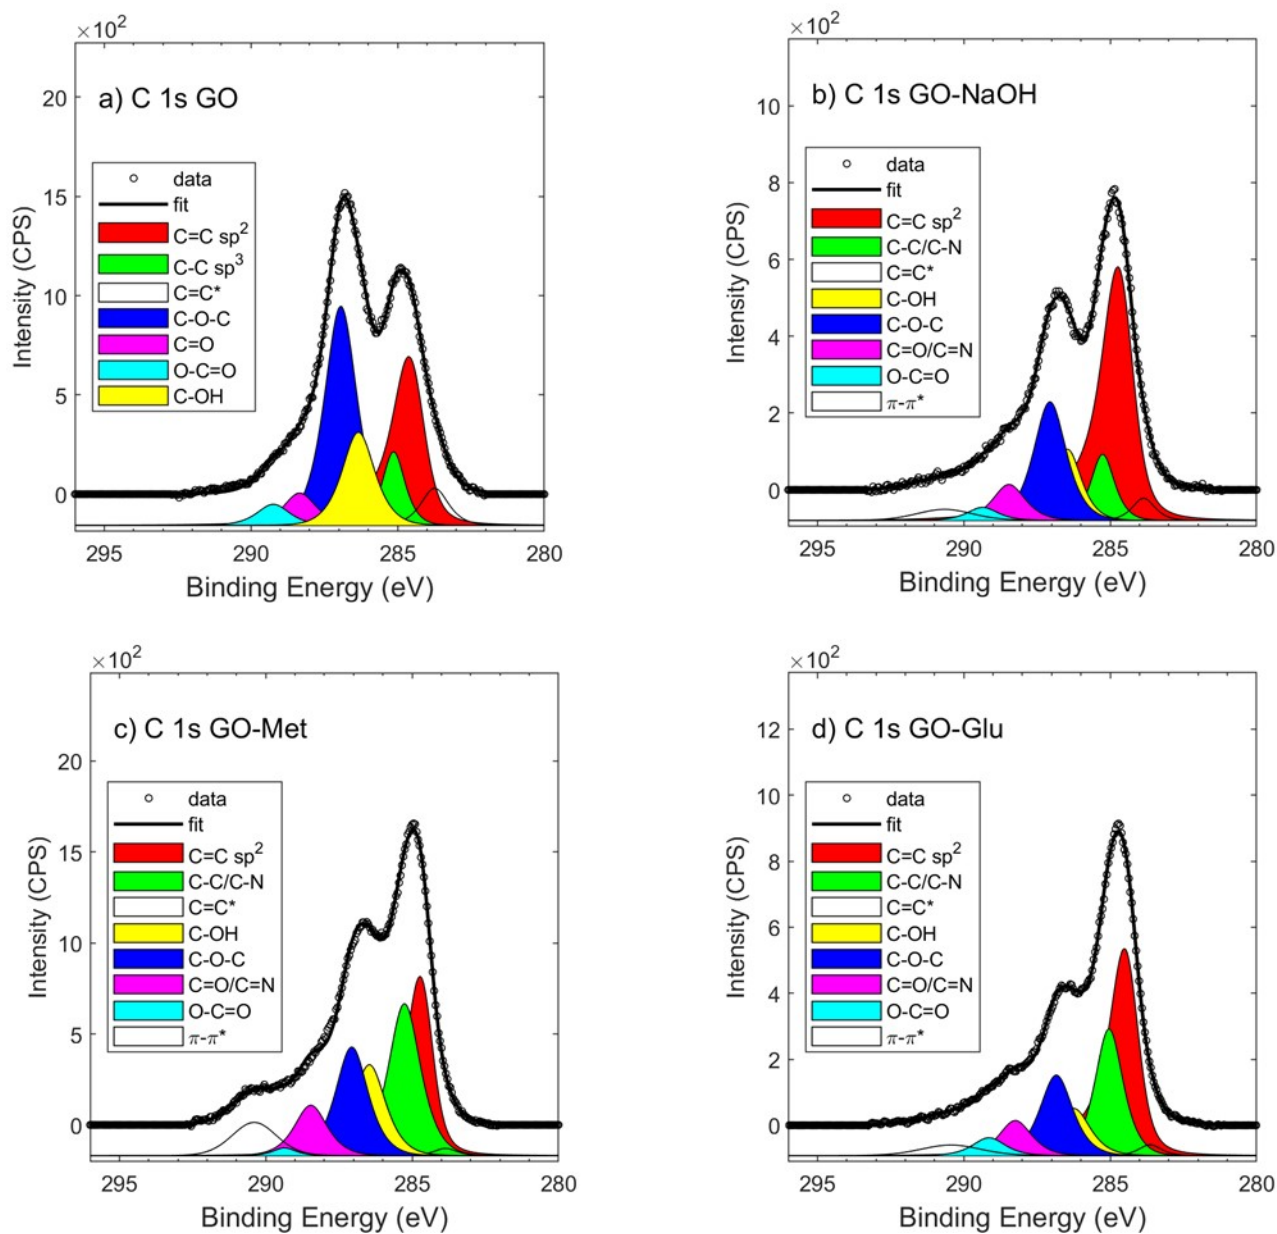

**Fig. S4.** C1s XPS signal of a) GO, b) GO-NaOH, c) GO-Met and d) GO-Glu.

**Table S1.** C1s deconvolution of GO, GO-NaOH, GO-Glu and GO-Met, expressed in %. Some groups present possible overlaps (i.e. C-OH and C-N).

| Material | C 1s fit          |                   |      |          |       |         |       |
|----------|-------------------|-------------------|------|----------|-------|---------|-------|
|          | C sp <sup>2</sup> | C sp <sup>3</sup> | C=C* | C-OH/C-N | C-O-C | C=O/C=N | O-C=O |
| GO       | 31.2              | 7.9               | 4.8  | 14.3     | 33.7  | 5.0     | 3.2   |
| GO-NaOH  | 51.2              | 8.0               | 2.6  | 10.1     | 19.9  | 6.0     | 2.1   |
| GO-Glu   | 43.3              | 20.8              | 1.4  | 9.0      | 15.3  | 6.7     | 3.4   |
| GO-Met   | 45.6              | 14.0              | 0.3  | 16.6     | 13.9  | 6.6     | 3.1   |

**Table S2.** Atomic ratios of modified GO compounds obtained by XPS.

| Material | N/C   | S/C   | O/C  |
|----------|-------|-------|------|
| GO       | 0.01  | 0.014 | 0.38 |
| GO-NaOH  | 0.003 | -     | 0.36 |
| GO-Met   | 0.011 | 0.010 | 0.19 |
| GO-Glu   | 0.009 | -     | 0.26 |
| GO-Lys   | 0.04  | -     | 0.14 |

#### 4. Elemental Analysis

**Table S3.** Atomic ratios of amino acids. Expected values between parentheses.

| Amino acid | formula           | H/C       | N/C         | S/C         | O/C         |
|------------|-------------------|-----------|-------------|-------------|-------------|
| Met        | $C_6H_{13}NO_2S$  | 2.4 (2.7) | 0.17 (0.17) | 0.17 (0.17) | 0.36 (0.33) |
| Glu        | $NaC_5H_8NO_4$    | 2.0 (1.6) | 0.20 (0.20) | <0.002      | 1.01 (0.80) |
| Lys        | $C_6H_{14}N_2O_2$ | 2.5 (2.3) | 0.33 (0.33) | <0.001      | 0.43 (0.33) |

**Table S4.** Atomic ratios of modified GO materials.

| Material | H/C  | N/C   | S/C   | O/C  |
|----------|------|-------|-------|------|
| GO       | 0.71 | 0.002 | 0.010 | 0.77 |
| GO-NaOH  | 1.07 | 0.001 | 0.003 | 0.92 |
| GO-Met   | 0.74 | 0.020 | 0.012 | 0.49 |
| GO-Glu   | 0.95 | 0.008 | -     | 0.67 |
| GO-Lys   | 0.96 | 0.06  | -     | 0.62 |

## 5. Adsorption selectivity and kinetic experiments

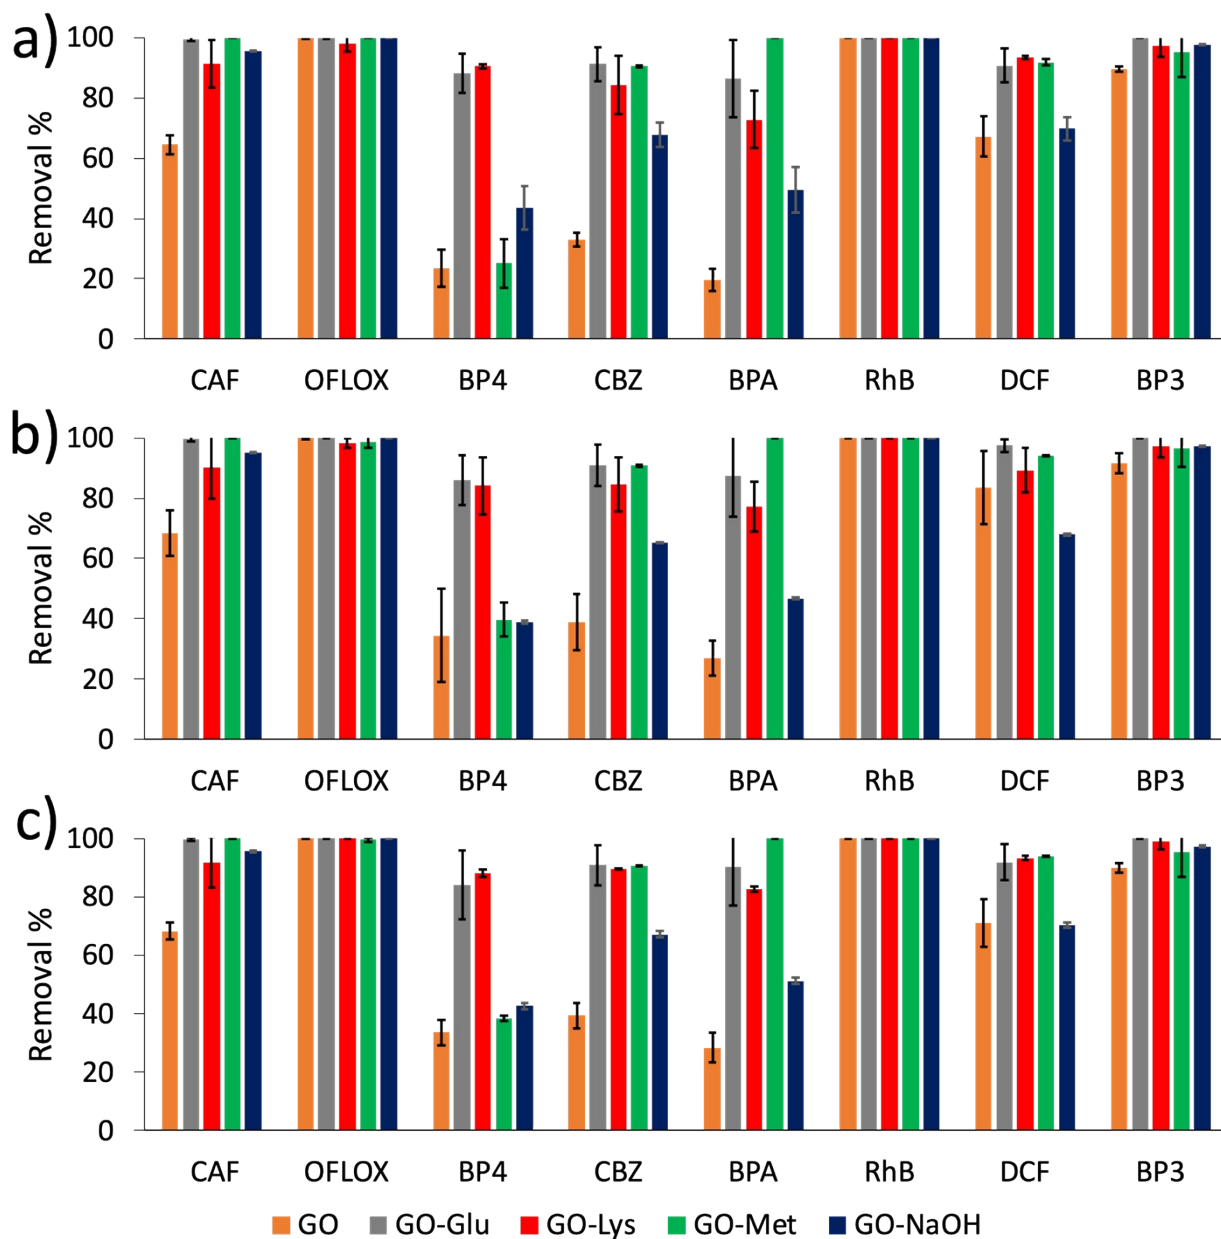

**Figure S5.** Removal at different contact time of each contaminant from the mixture in tap water (total volume=10 mL, sorbent amount= 25 mg,  $C_{IN}=5$  mg/L of each contaminant) by GO (orange), GO-NaOH (dark blue), GO-Glu (grey), GO-Met (green) and GO-Lys (red). a) contact time 1 h, b) contact time 4h and c) contact time 24 h. Values of GO, GO-NaOH and GO-Lys from ref<sup>1</sup>.

## 6. Adsorption isotherms

**Table S5.** Experimental parameters of material and solutions used for GO-Met isotherms on BP4, BPA and CBZ.

| GO-Met |                               |                |        |                               |                |        |                               |                |
|--------|-------------------------------|----------------|--------|-------------------------------|----------------|--------|-------------------------------|----------------|
| Sample | C <sub>0</sub> BP4<br>(mg/mL) | GO-Met<br>(mg) | Sample | C <sub>0</sub> BPA<br>(mg/mL) | GO-Met<br>(mg) | Sample | C <sub>0</sub> CBZ<br>(mg/mL) | GO-Met<br>(mg) |
| 1      | 0.5                           | 7              | 1      | 0.27                          | 2              | 1      | 0.09                          | 1              |
| 2      | 0.5                           | 5              | 2      | 0.15                          | 5              | 2      | 0.09                          | 0.5            |
| 3      | 0.5                           | 2              | 3      | 0.15                          | 2              | 3      | 0.08                          | 3              |
| 4      | 0.25                          | 5              | 4      | 0.09                          | 2              | 4      | 0.06                          | 1              |
| 5      | 0.25                          | 2              | 5      | 0.06                          | 3              | 5      | 0.06                          | 1              |
| 6      | 0.1                           | 3              | 6      | 0.06                          | 2              | 6      | 0.05                          | 3              |
| 7      | 0.1                           | 1              |        |                               |                | 7      | 0.05                          | 1              |
| 8      | 0.1                           | 2              |        |                               |                | 8      | 0.025                         | 5              |

**Table S6.** Experimental parameters of material and solutions used for GO-Glu isotherms on BP4, BPA and CBZ.

| GO-Glu |                               |                |        |                               |                |        |                               |                |
|--------|-------------------------------|----------------|--------|-------------------------------|----------------|--------|-------------------------------|----------------|
| Sample | C <sub>0</sub> BP4<br>(mg/mL) | GO-Glu<br>(mg) | Sample | C <sub>0</sub> BPA<br>(mg/mL) | GO-Glu<br>(mg) | Sample | C <sub>0</sub> CBZ<br>(mg/mL) | GO-Glu<br>(mg) |
| 1      | 0.5                           | 7              | 1      | 0.24                          | 3              | 1      | 0.09                          | 1              |
| 2      | 0.5                           | 5              | 2      | 0.24                          | 1              | 2      | 0.08                          | 3              |
| 3      | 0.5                           | 2              | 3      | 0.15                          | 5              | 3      | 0.08                          | 1              |
| 4      | 0.25                          | 5              | 4      | 0.15                          | 2              | 4      | 0.05                          | 5              |
| 5      | 0.25                          | 2              | 5      | 0.09                          | 5              | 5      | 0.05                          | 3              |
| 6      | 0.1                           | 5              | 6      | 0.09                          | 2              | 6      | 0.05                          | 1              |
| 7      | 0.1                           | 2              | 7      | 0.06                          | 2              | 7      | 0.025                         | 5              |
|        |                               |                |        |                               |                | 8      | 0.025                         | 2              |



**Table S7.** Experimental parameters of material and solutions used for GO-Glu isotherms on BP4, BPA and CBZ

| rGO    |                            |          |        |                            |          |        |                            |          |
|--------|----------------------------|----------|--------|----------------------------|----------|--------|----------------------------|----------|
| Sample | C <sub>0</sub> BP4 (mg/mL) | rGO (mg) | Sample | C <sub>0</sub> BPA (mg/mL) | rGO (mg) | Sample | C <sub>0</sub> CBZ (mg/mL) | rGO (mg) |
| 1      | 0.8                        | 3        | 1      | 0.24                       | 3        | 1      | 0.09                       | 1        |
| 2      | 0.8                        | 1        | 2      | 0.24                       | 1        | 2      | 0.07                       | 2        |
| 3      | 0.5                        | 5        | 3      | 0.18                       | 5        | 3      | 0.05                       | 5        |
| 4      | 0.5                        | 3        | 4      | 0.18                       | 1        | 4      | 0.05                       | 3        |
| 5      | 0.25                       | 5        | 5      | 0.06                       | 3        | 5      | 0.05                       | 1        |
| 6      | 0.1                        | 5        | 6      | 0.06                       | 1        | 6      | 0.025                      | 5        |
| 7      | 0.1                        | 3        |        |                            |          | 7      | 0.01                       | 3        |
| 8      | 0.05                       | 3        |        |                            |          | 8      | 0.01                       | 1        |
| 9      | 0.05                       | 1        |        |                            |          |        |                            |          |
| 10     | 0.01                       | 3        |        |                            |          |        |                            |          |
| 11     | 0.01                       | 1        |        |                            |          |        |                            |          |

**Table S8.** Adsorption model and complete fitting for BP4 isotherm. \*Values from ref.<sup>1</sup>

| Langmuir | $Q_e = Q_m \cdot \frac{C_e \cdot K_L}{1 + K_L \cdot C_e}$ |                           |                | BET | $Q_e = \frac{Q_m \cdot C_{BET} \cdot x}{(1 - x) \cdot (1 + C_{BET} \cdot x - x)}$ |                           |                  |
|----------|-----------------------------------------------------------|---------------------------|----------------|-----|-----------------------------------------------------------------------------------|---------------------------|------------------|
|          | Q <sub>m</sub><br>(mg/g)                                  | K <sub>L</sub><br>(mL/mg) | R <sup>2</sup> |     | Q <sub>m</sub><br>(mg/g)                                                          | C <sub>s</sub><br>(mg/mL) | C <sub>BET</sub> |
| GO*      | 45                                                        | 4                         | 0.311          | 11  | 0.6                                                                               | 18                        | 0.7724           |
| GO-NaOH* | 62                                                        | 22                        | 0.9891         | 21  | 1                                                                                 | 46                        | 0.8841           |
| rGO      | 115                                                       | 10                        | 0.9686         | 33  | 1                                                                                 | 30                        | 0.9145           |
| GO-Met   | 205                                                       | 265                       | 0.9836         | 102 | 0.7                                                                               | 98                        | 0.9325           |
| GO-Lys*  | 292                                                       | 8.1                       | 0.9859         | 117 | 1                                                                                 | 85                        | 0.779            |

|               |     |     |        |    |     |    |        |
|---------------|-----|-----|--------|----|-----|----|--------|
| <b>GO-Glu</b> | 248 | 3.8 | 0.7094 | 77 | 0.7 | 16 | 0.9684 |
|---------------|-----|-----|--------|----|-----|----|--------|

**Table S9.** Adsorption model and complete fitting for BPA isotherm. \*Values from ref.<sup>1</sup>

| <b>Langmuir</b> | $Q_e = Q_m \cdot \frac{C_e \cdot K_L}{1 + K_L \cdot C_e}$ |                                 |                      | <b>BET</b> | $Q_e = \frac{Q_m \cdot C_{BET} \cdot x}{(1-x) \cdot (1 + C_{BET} \cdot x - x)}$ |                                 |                        |
|-----------------|-----------------------------------------------------------|---------------------------------|----------------------|------------|---------------------------------------------------------------------------------|---------------------------------|------------------------|
|                 | <b>Q<sub>m</sub></b><br>(mg/g)                            | <b>K<sub>L</sub></b><br>(mL/mg) | <b>R<sup>2</sup></b> |            | <b>Q<sub>m</sub></b><br>(mg/g)                                                  | <b>C<sub>s</sub></b><br>(mg/mL) | <b>C<sub>BET</sub></b> |
| <b>GO*</b>      | 33.3                                                      | 30                              | 0.2                  | 14         | 0.22                                                                            | 70                              | 0.8186                 |
| <b>GO-NaOH*</b> | 48                                                        | 19                              | 0.9702               | 16         | 0.3                                                                             | 63                              | 0.8967                 |
| <b>rGO</b>      | 78                                                        | 151                             | 0.9483               | 30         | 0.3                                                                             | 33                              | 0.8149                 |
| <b>GO-Met</b>   | 147                                                       | 17                              | 0.9443               | 47         | 0.29                                                                            | 21                              | 0.9425                 |
| <b>GO-Lys*</b>  | 295                                                       | 43                              | 0.9809               | 142        | 0.3                                                                             | 70                              | 0.9552                 |
| <b>GO-Glu</b>   | 237                                                       | 16.8                            | 0.956                | 74         | 0.3                                                                             | 68                              | 0.9206                 |

**Table S10.** Adsorption model and complete fitting for CBZ isotherm. \* Values from ref.<sup>1</sup>

| <b>Langmuir</b> | $Q_e = Q_m \cdot \frac{C_e \cdot K_L}{1 + K_L \cdot C_e}$ |                                 |                      | <b>BET</b> | $Q_e = \frac{Q_m \cdot C_{BET} \cdot x}{(1-x) \cdot (1 + C_{BET} \cdot x - x)}$ |                                 |                        |
|-----------------|-----------------------------------------------------------|---------------------------------|----------------------|------------|---------------------------------------------------------------------------------|---------------------------------|------------------------|
|                 | <b>Q<sub>m</sub></b><br>(mg/g)                            | <b>K<sub>L</sub></b><br>(mL/mg) | <b>R<sup>2</sup></b> |            | <b>Q<sub>m</sub></b><br>(mg/g)                                                  | <b>C<sub>s</sub></b><br>(mg/mL) | <b>C<sub>BET</sub></b> |
| <b>GO*</b>      | 7                                                         | 86                              | 0.9398               | 125        | 0.08                                                                            | 52                              | 0.9078                 |
| <b>GO-NaOH*</b> | 80.8                                                      | 12                              | 0.8471               | 12.8       | 0.1                                                                             | 26                              | 0.8275                 |
| <b>rGO</b>      | 43                                                        | 127                             | 0.9682               | 9          | 0.1                                                                             | 102                             | 0.7776                 |
| <b>GO-Met</b>   | 131                                                       | 760                             | 0.997                | 54         | 0.1                                                                             | 183                             | 0.9175                 |
| <b>GO-Lys*</b>  | 172                                                       | 102                             | 0.952                | 73         | 0.1                                                                             | 34                              | 0.8643                 |
| <b>GO-Glu</b>   | 121                                                       | 94                              | 0.968                | 36         | 0.08                                                                            | 55                              | 0.8845                 |

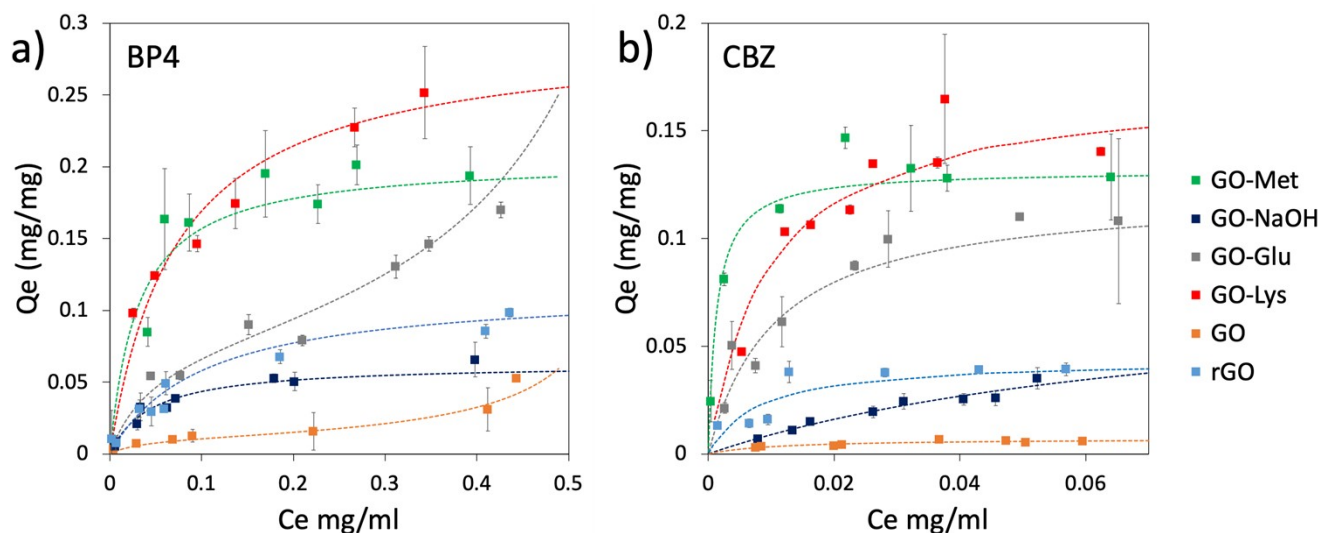

**Fig. S6.** Adsorption isotherm for a) BP4, b) CBZ. GO-Met (green line), GO-NaOH (dark blue line), GO-Lys (red line), GO-Glu (grey line), GO (orange line) and rGO (light blue line). Values of GO, GO-NaOH and GO-Lys from ref<sup>1</sup>.

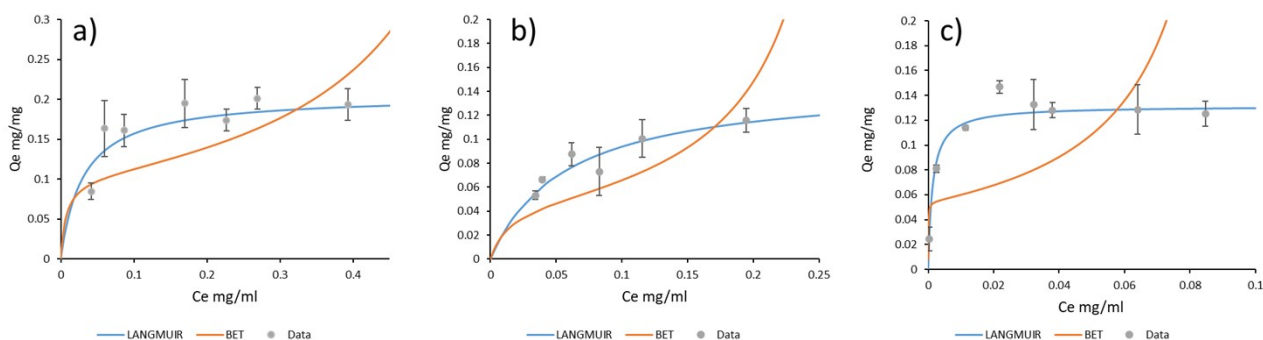

**Fig. S7.** Adsorption isotherm of GO-Met toward a) BP4, b) BPA and c) CBZ.

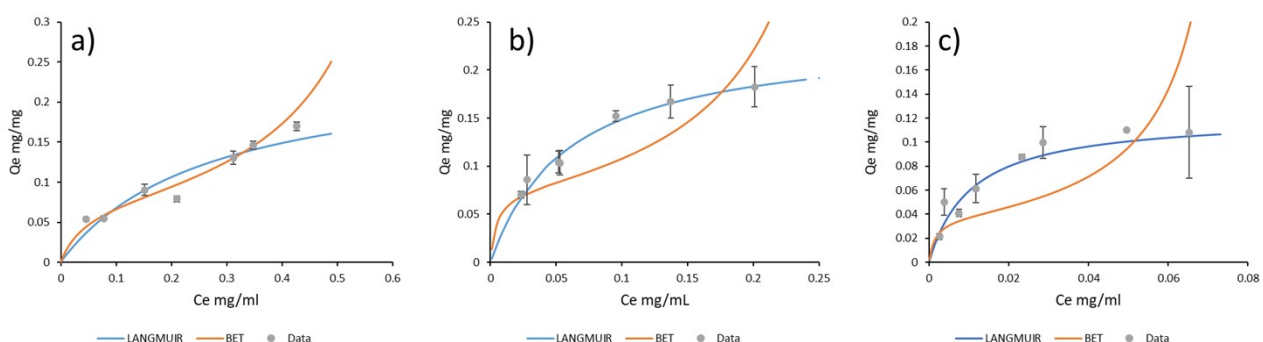

**Fig. S8.** Adsorption isotherm of GO-Glu toward a) BP4, b) BPA and c) CBZ.

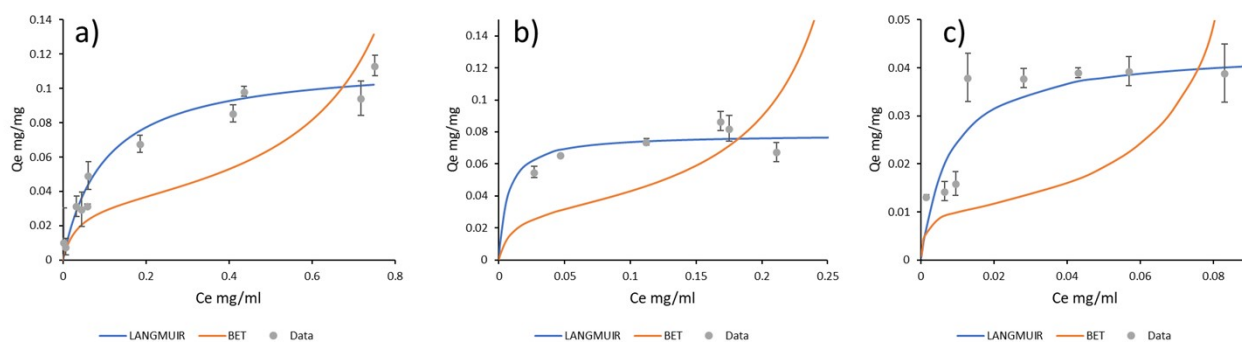

**Fig. S9.** Adsorption isotherm of rGO toward a) BP4, b) BPA and c) CBZ.

## 7. Molecular dynamic simulation

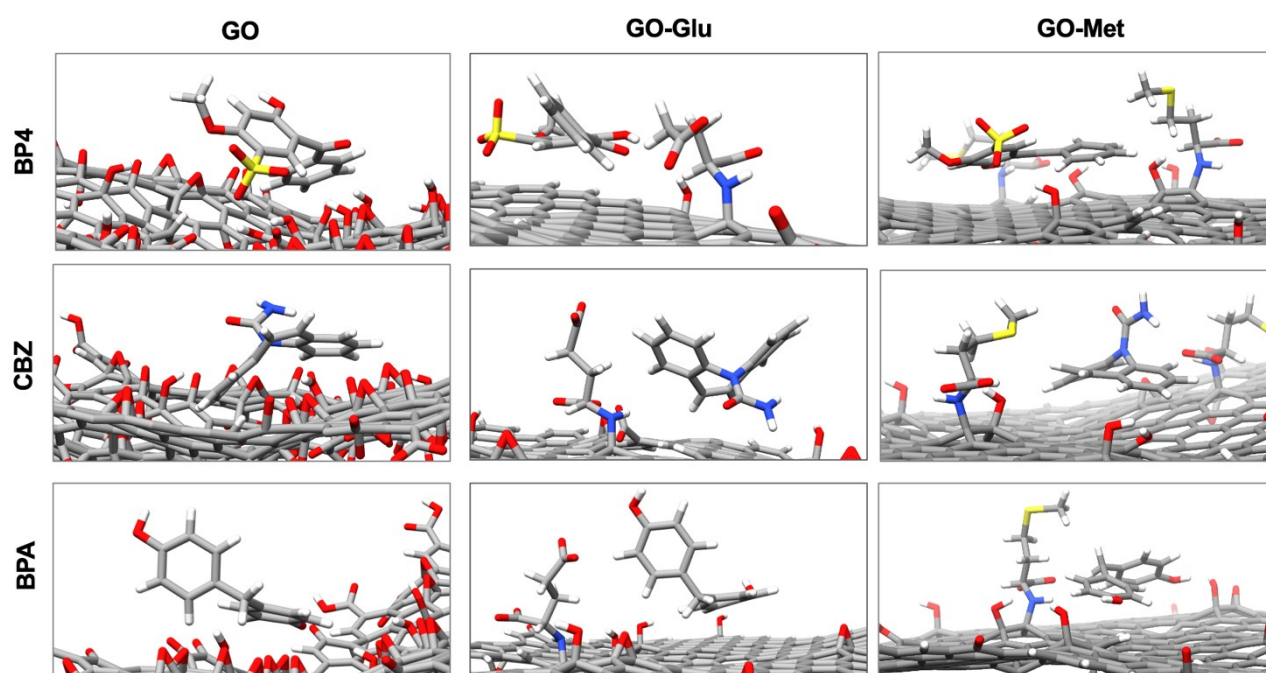

**Fig. S10.** Representative snapshots from MD simulations of the favourite adsorption sites of BP4, CBZ, and BPA on GO (left column), GO-Glu (inner column), and GO-Met (right column) sheets. Results on GO-Lys are report in ref <sup>1</sup>.

**Table S11.** Variation of the solvent accessible surface area (DSASA) of BP4, CBZ, BPA and GO, GO-Glu and GO-Met nanosheets, upon binding.  $\Delta\Delta$ SASA is the variation of  $\Delta$ SASA of amino acid modified GO nanosheets, compared to GO.

| Contaminant | Material | $\Delta$ SASA [ $\text{\AA}^2$ ] | $\Delta\Delta$ SASA [ $\text{\AA}^2$ ] |
|-------------|----------|----------------------------------|----------------------------------------|
| BP4         | GO       | 372.7                            | -                                      |
|             | GO-Glu   | 686.3                            | 313.6                                  |
|             | GO-Met   | 704.8                            | 332.1                                  |
| CBZ         | GO       | 298.9                            | -                                      |
|             | GO-Glu   | 612.5                            | 313.6                                  |
|             | GO-Met   | 657.7                            | 358.8                                  |
| BPA         | GO       | 317.3                            | -                                      |
|             | GO-Glu   | 538.7                            | 221.4                                  |
|             | GO-Met   | 631.0                            | 313.7                                  |

## References

- Mantovani, S.; Khaliha, S.; Marforio, T. D.; Kovtun, A.; Favaretto, L.; Tunioli, F.; Bianchi, A.; Petrone, G.; Liscio, A.; Palermo, V.; Calvaresi, M.; Navacchia, M. L.; Melucci, M., Facile high-yield synthesis and purification of lysine-modified graphene oxide for enhanced drinking water purification. *Chem. Commun.* **2022**, 58 (70), 9766-9769.
